# Supplementary material
Source: PubMed Central journal article supplement (PMC3989637)

Fig. S5A: immunoblot

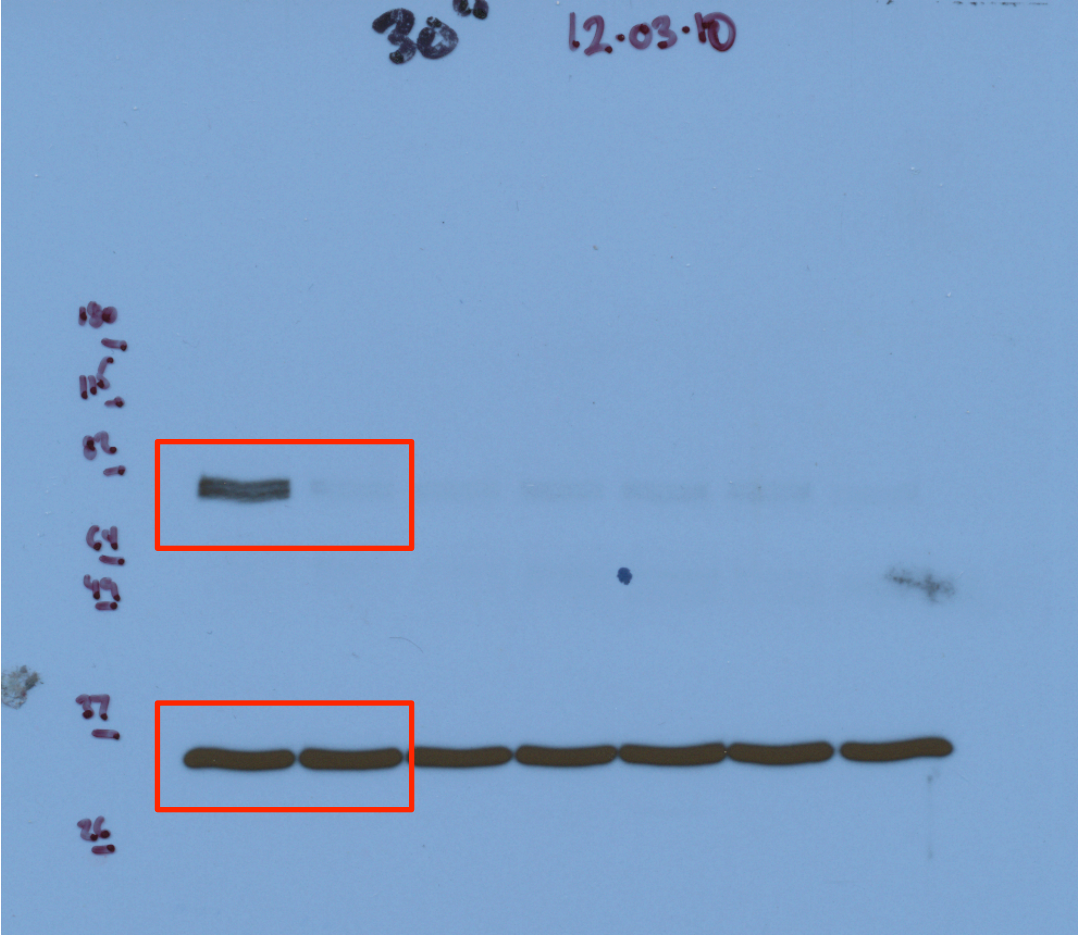

Supplement: embj0033-0282-sd10.pdf [file embj0033-0282-sd10.pdf]

Fig. S6B: immunoblot

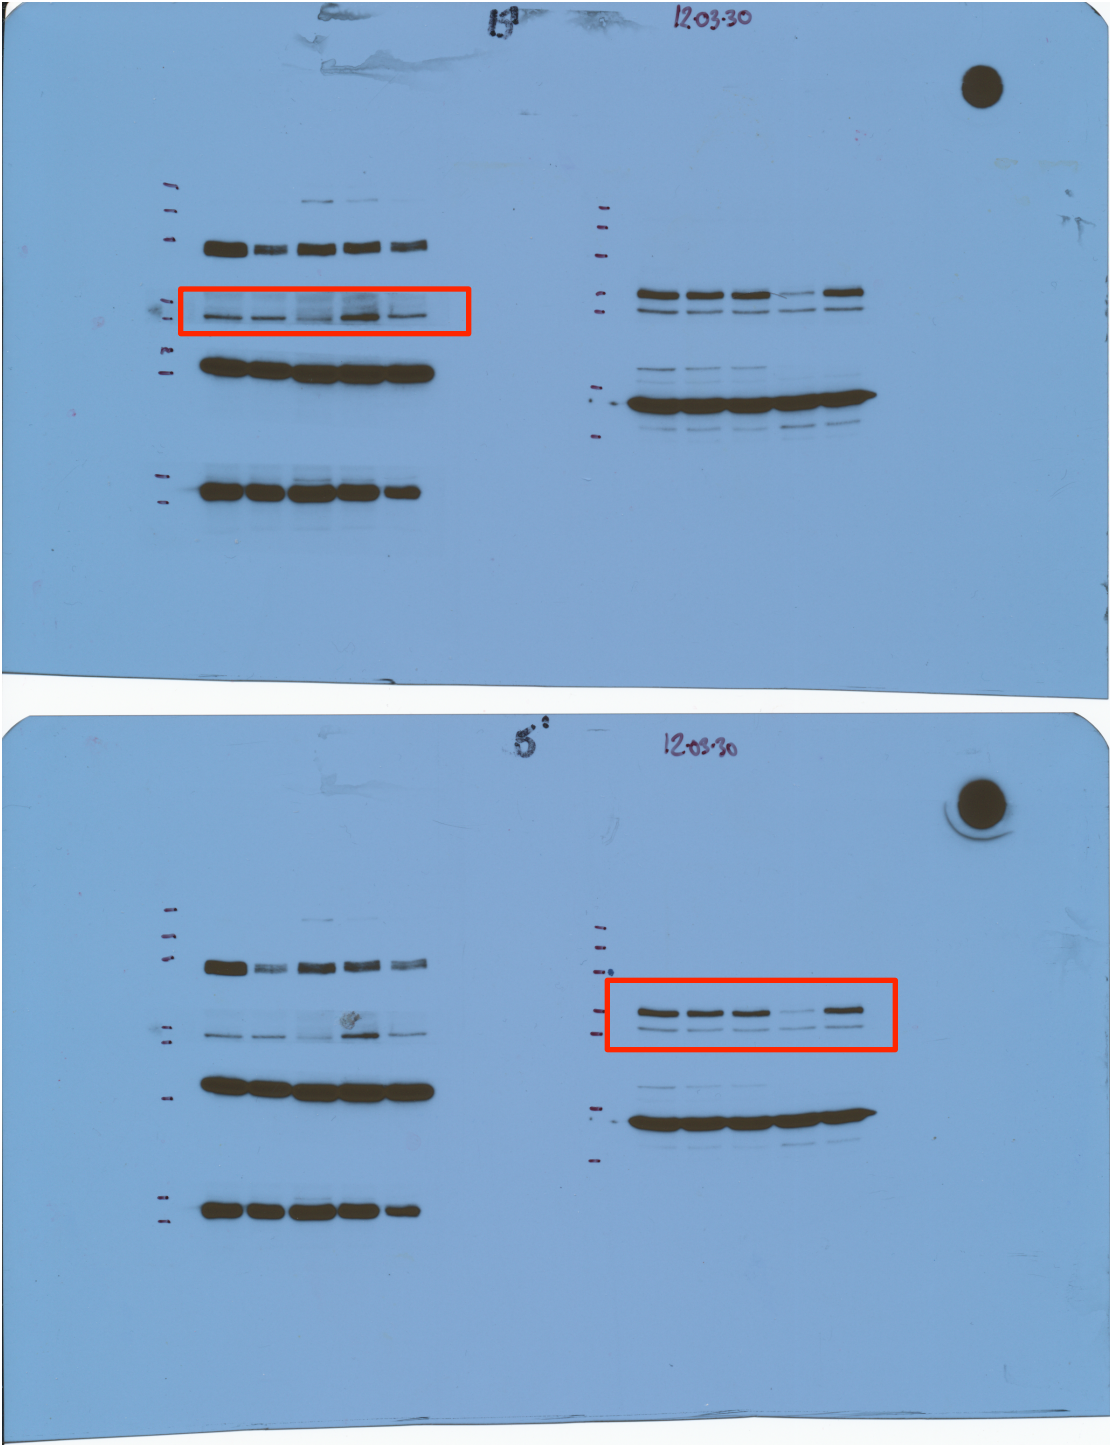

Fig. S6B: immunoblot

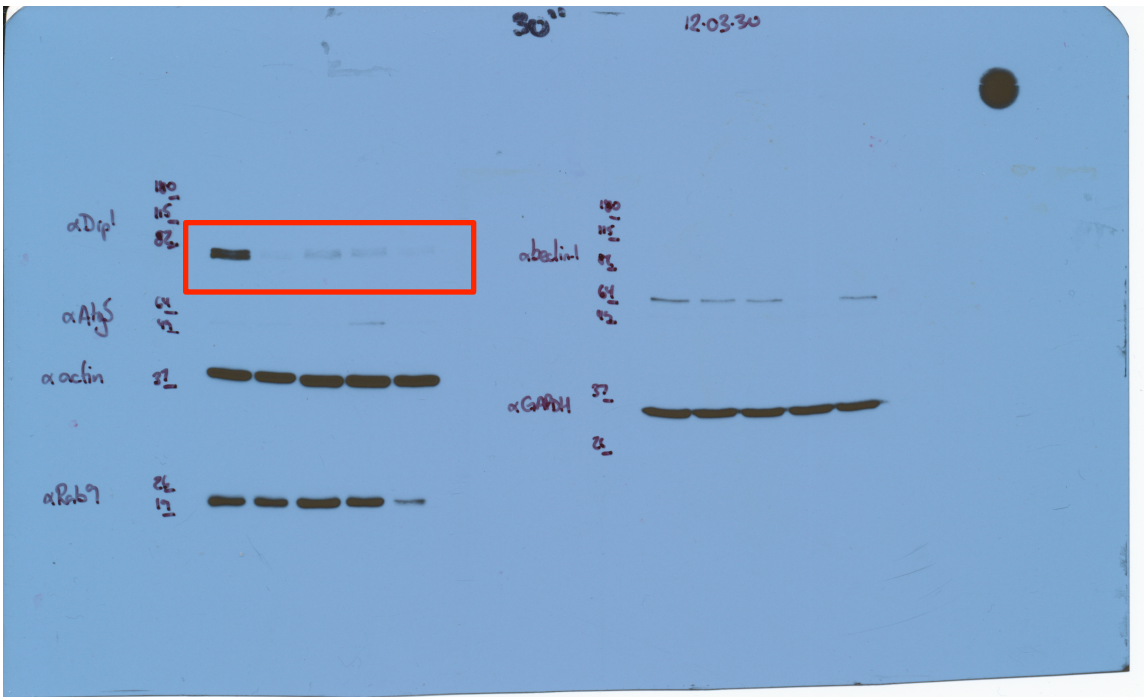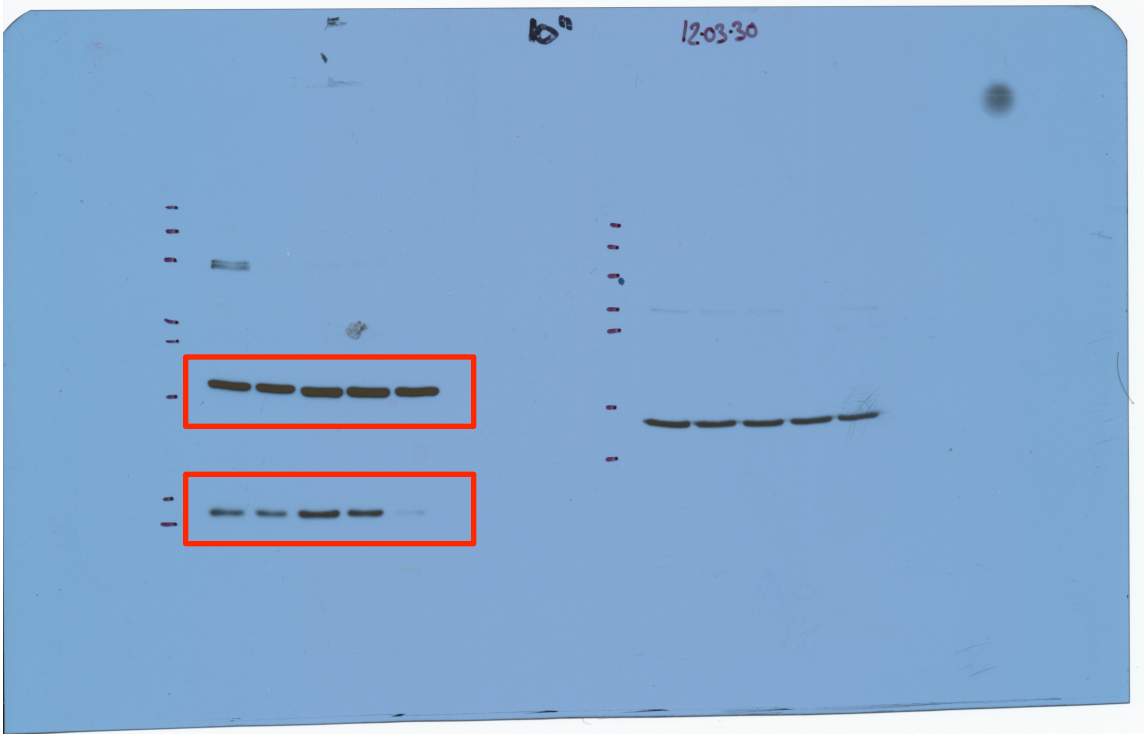

Supplement: embj0033-0282-sd11.pdf [file embj0033-0282-sd11.pdf]

Fig. S7A: immunoblot

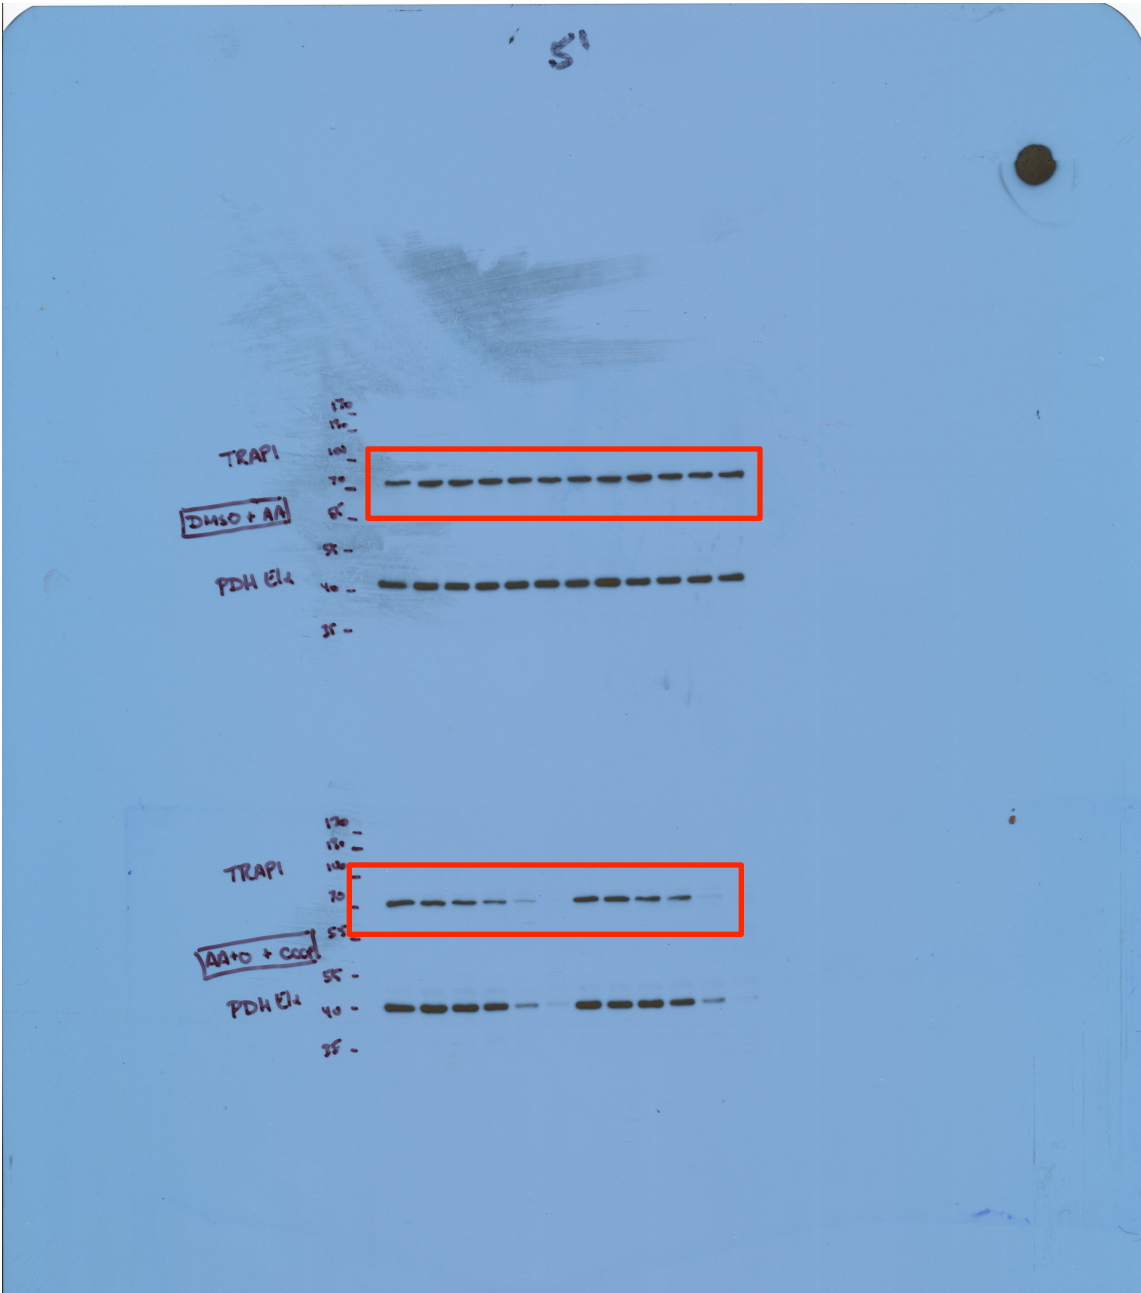

Fig. S7A: immunoblot

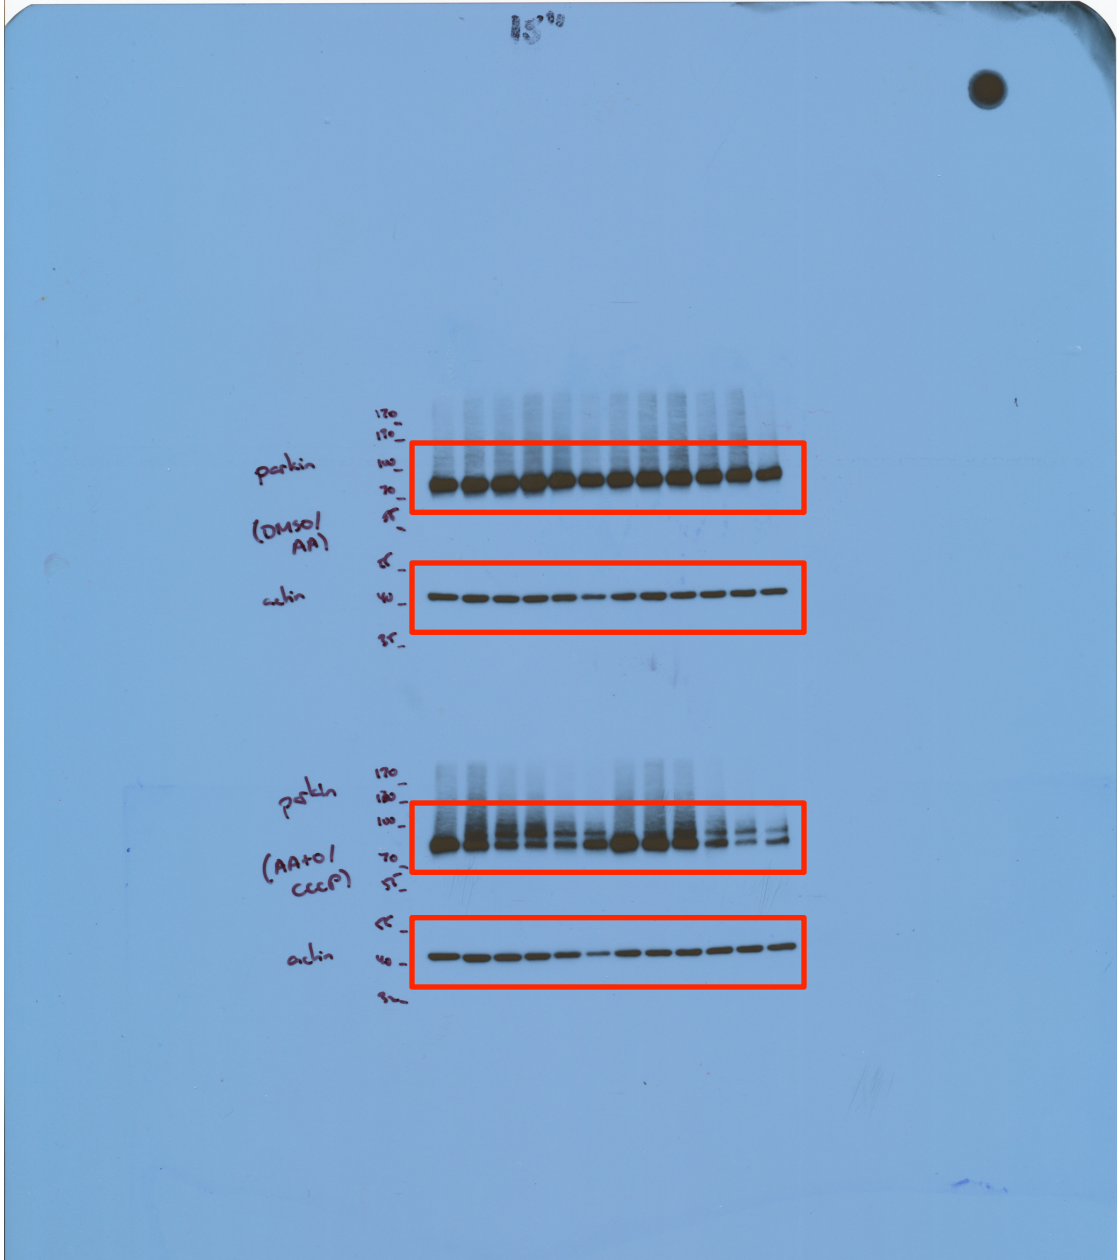



Fig. S7A: immunoblot

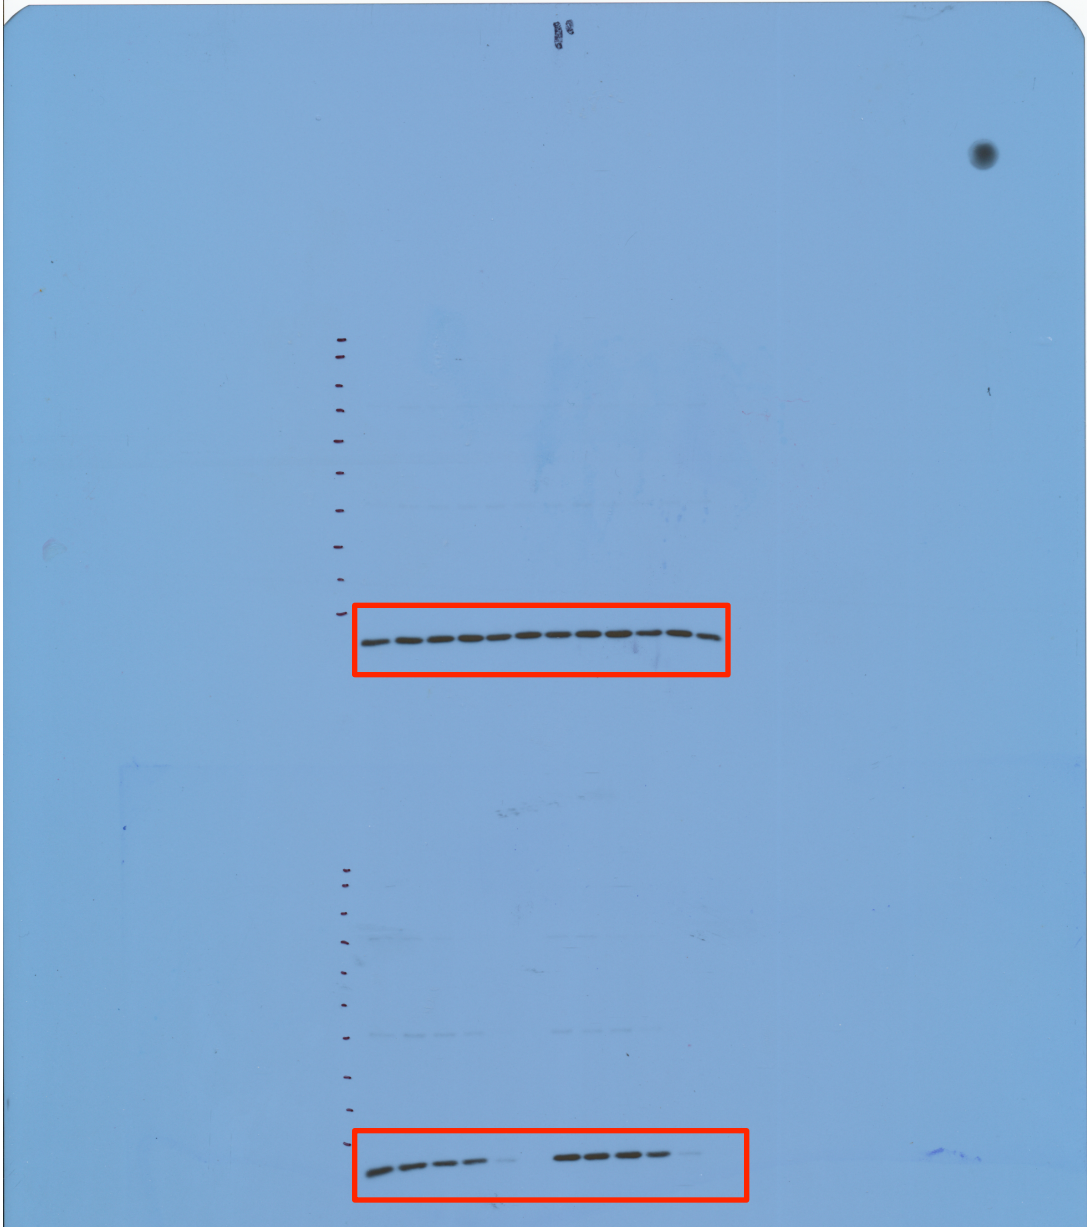

Supplement: embj0033-0282-sd12.pdf [file embj0033-0282-sd12.pdf]

**Fig. 2D: immunoblot**

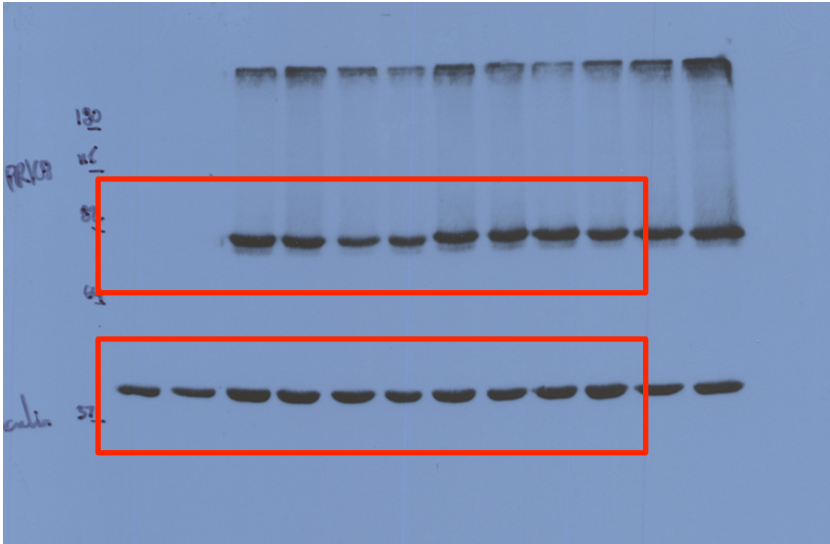

Supplement: embj0033-0282-sd15.pdf [file embj0033-0282-sd15.pdf]

Fig. 3A: immunoblot

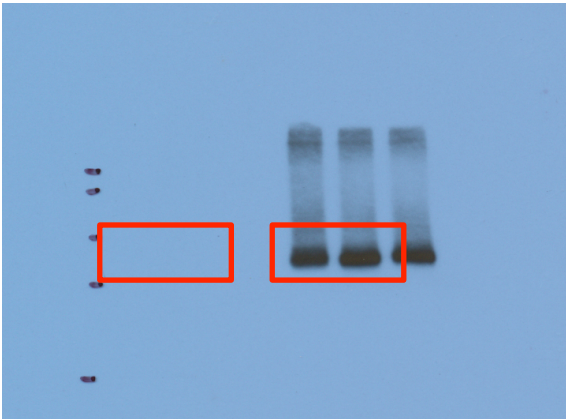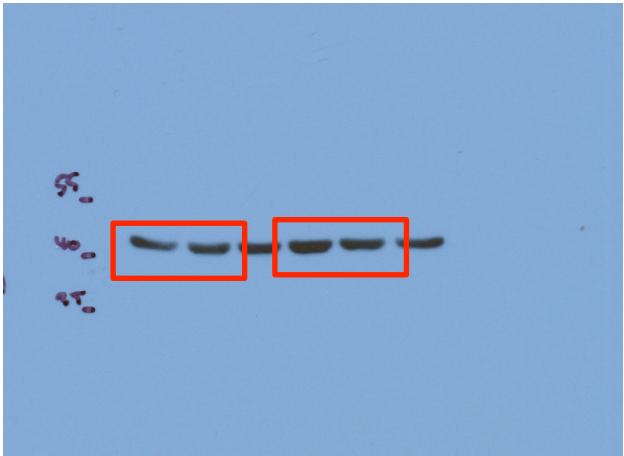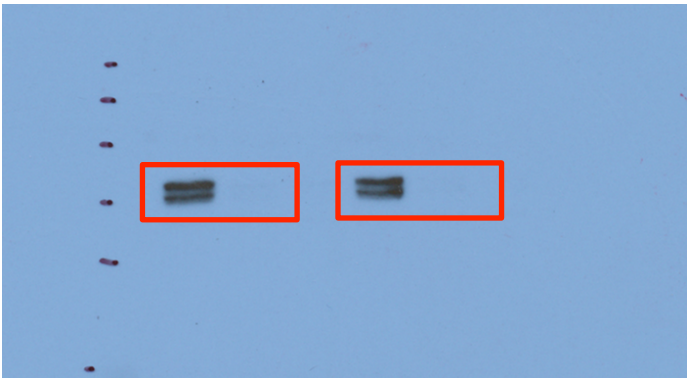

Supplement: embj0033-0282-sd16.pdf [file embj0033-0282-sd16.pdf]

Fig. 5A: immunoblot

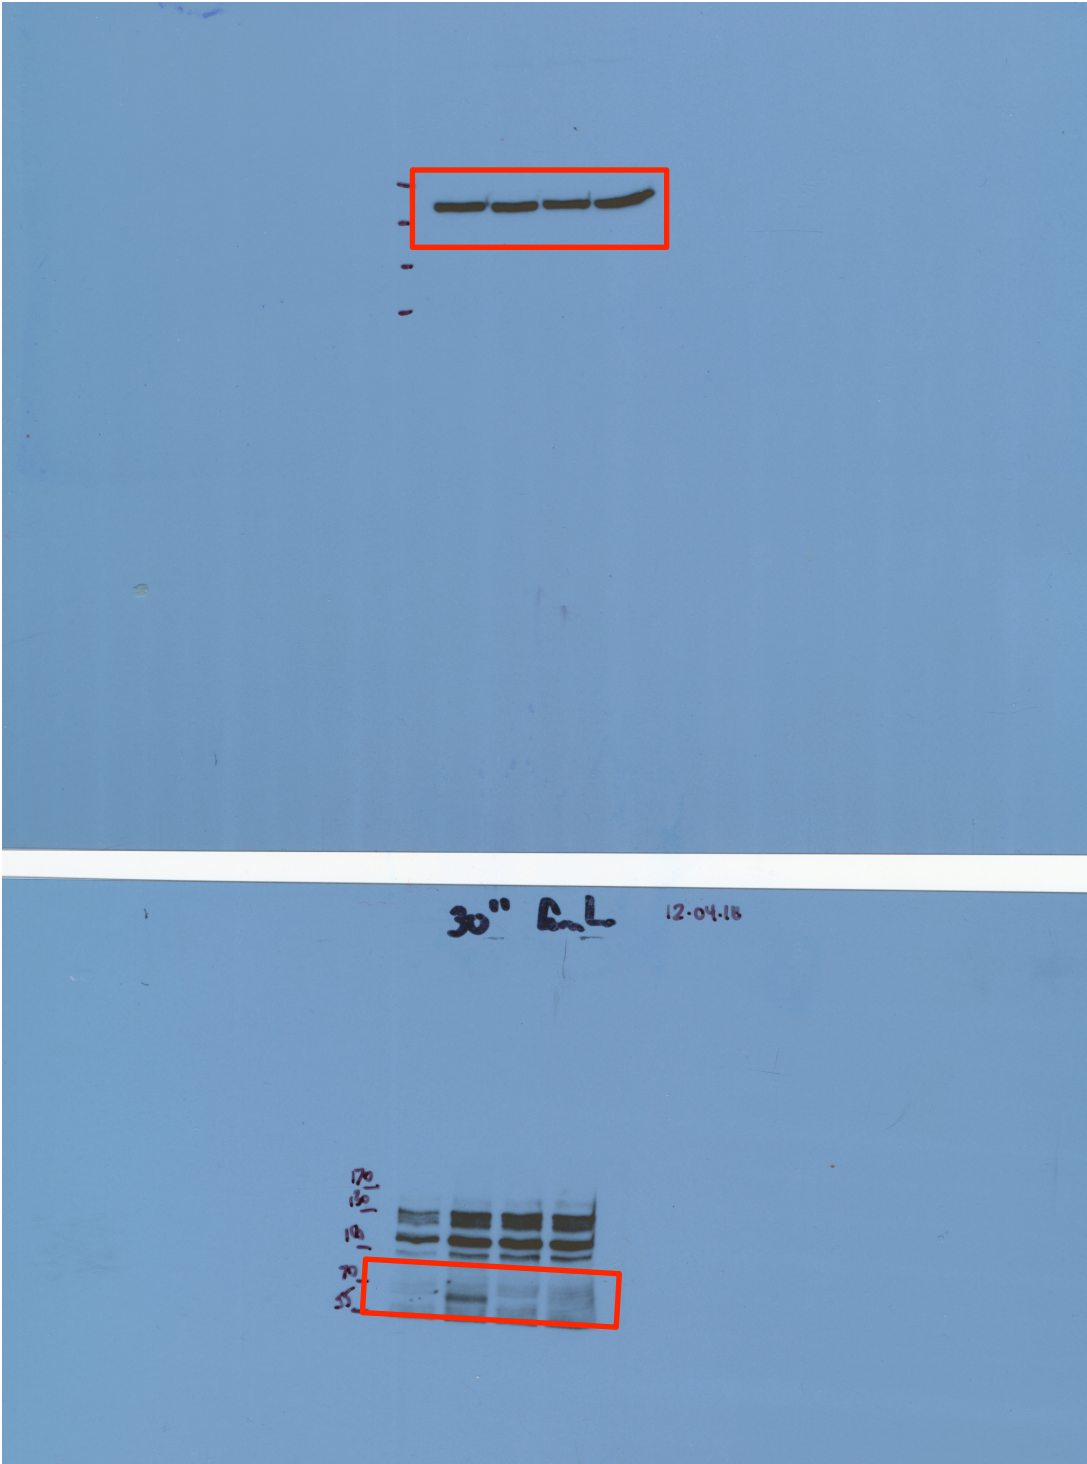

Supplement: embj0033-0282-sd17.pdf [file embj0033-0282-sd17.pdf]

Fig. 7A: immunoblot

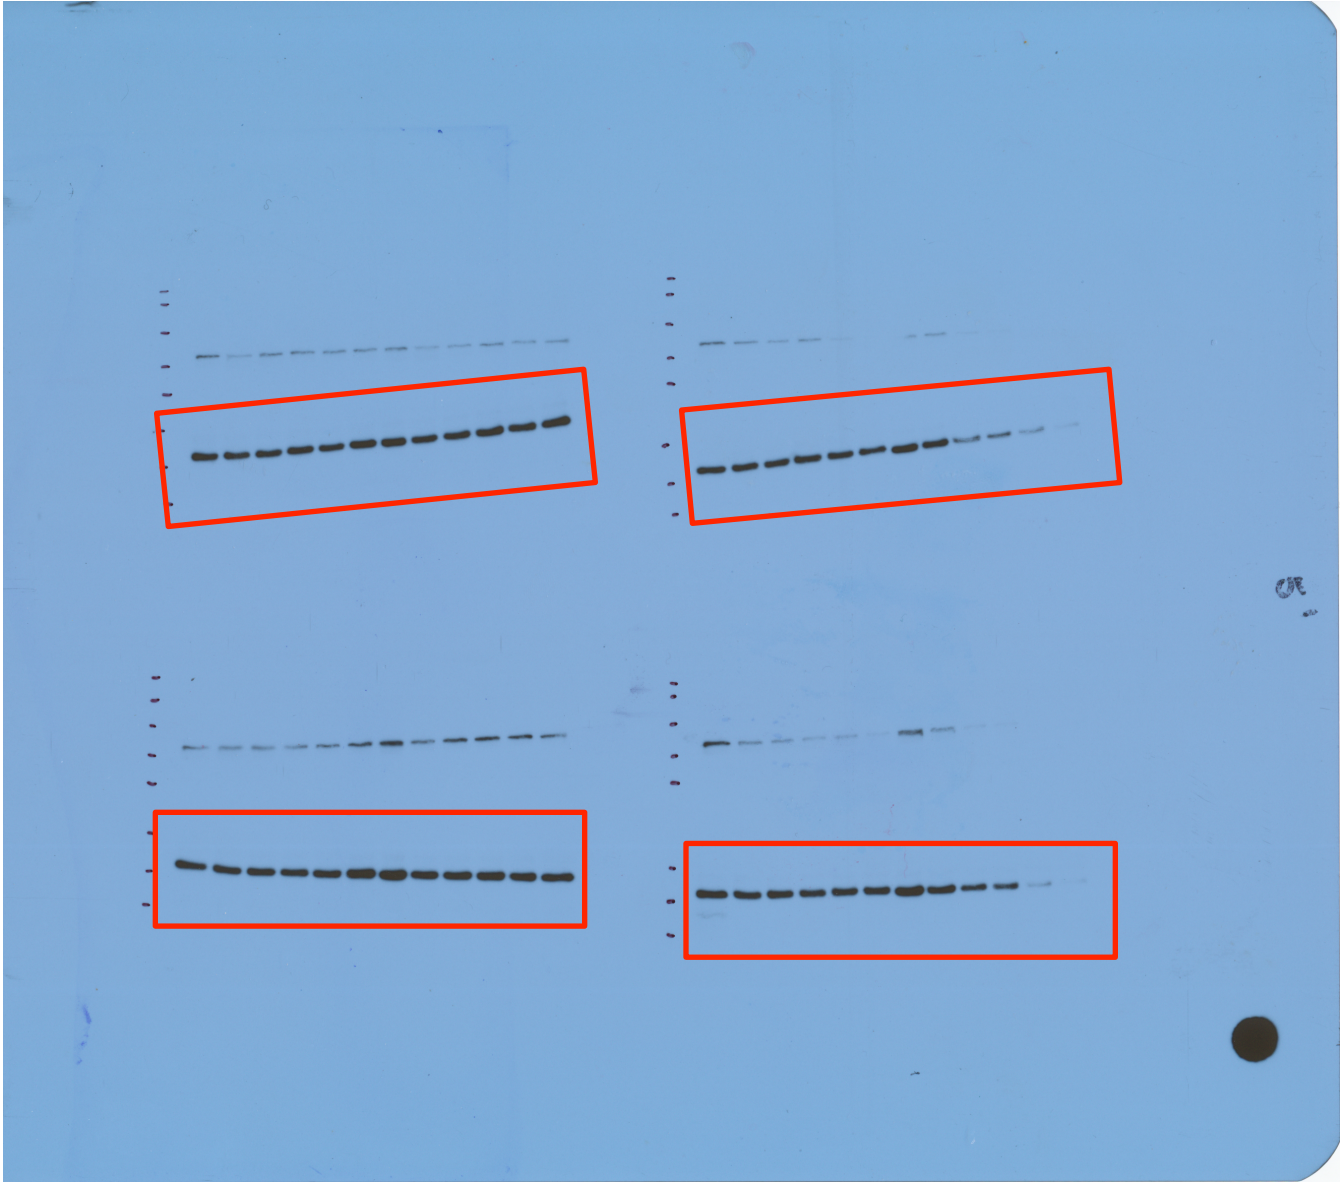

Fig. 7A: immunoblot

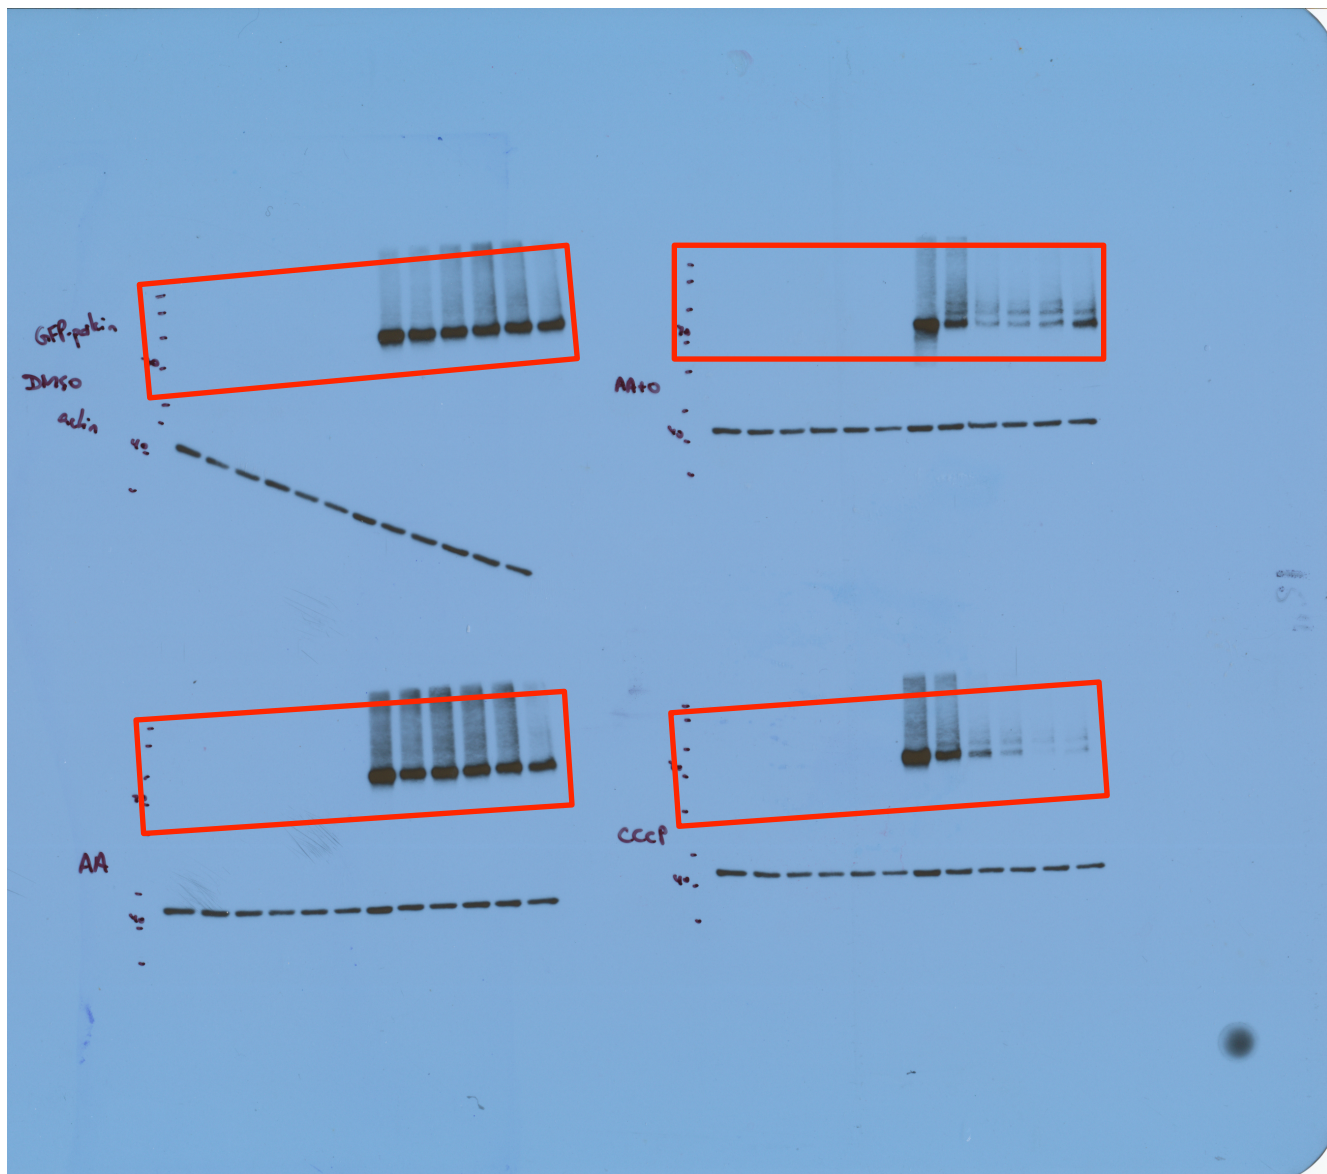



Fig. 7A: immunoblot

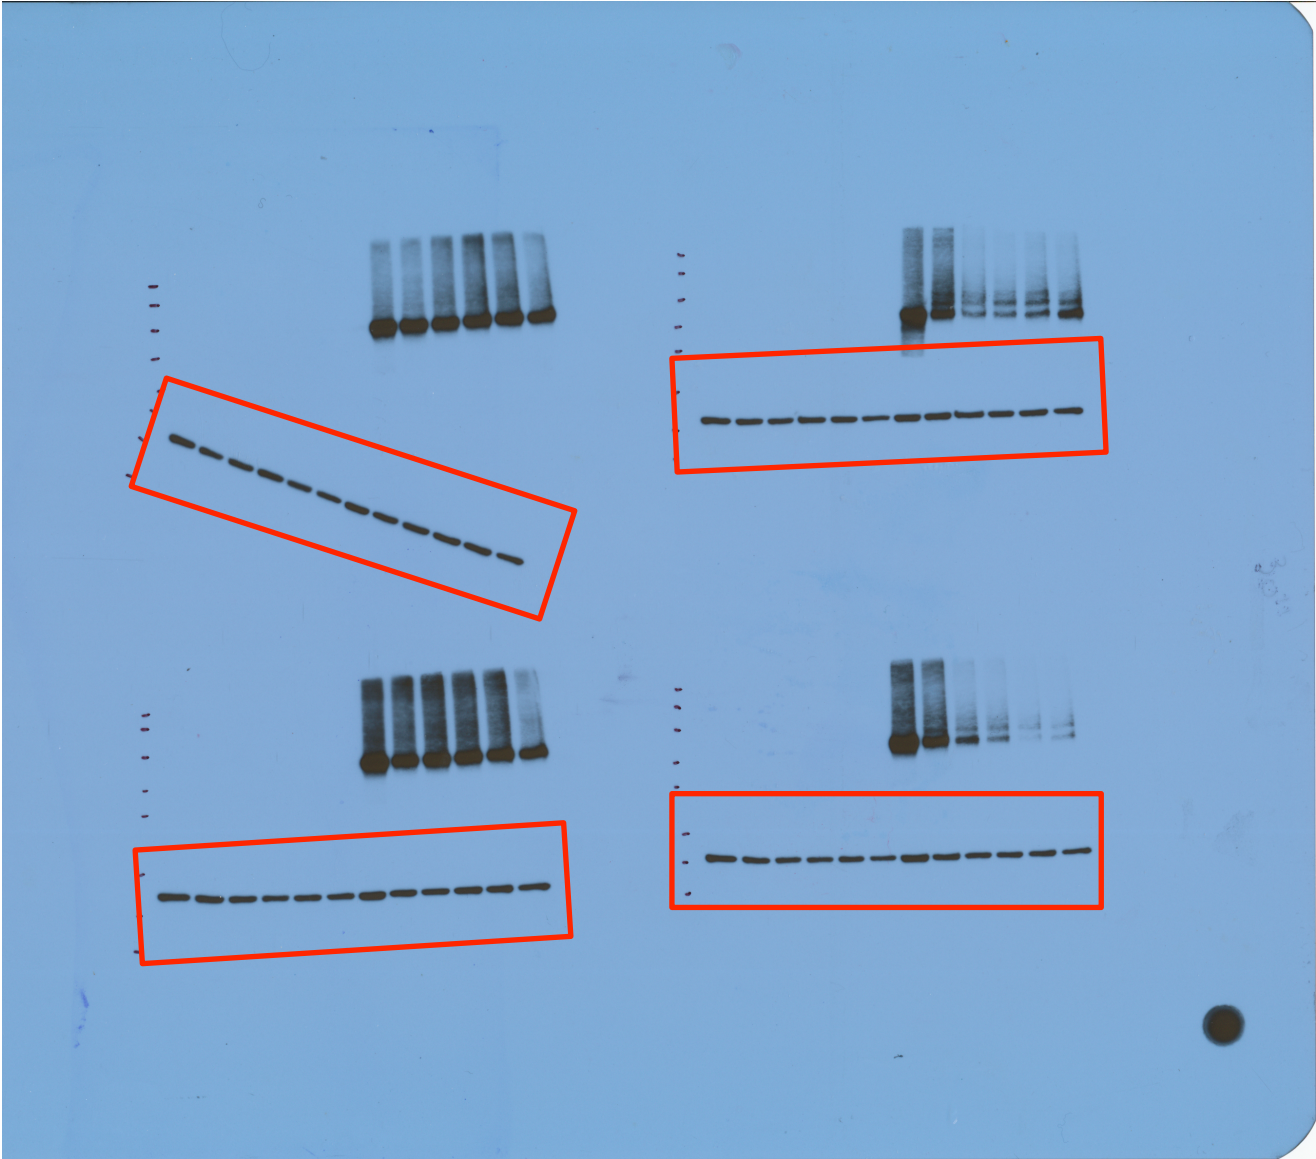

Supplement: embj0033-0282-sd18.pdf [file embj0033-0282-sd18.pdf]

Fig. S4D: immunoblot

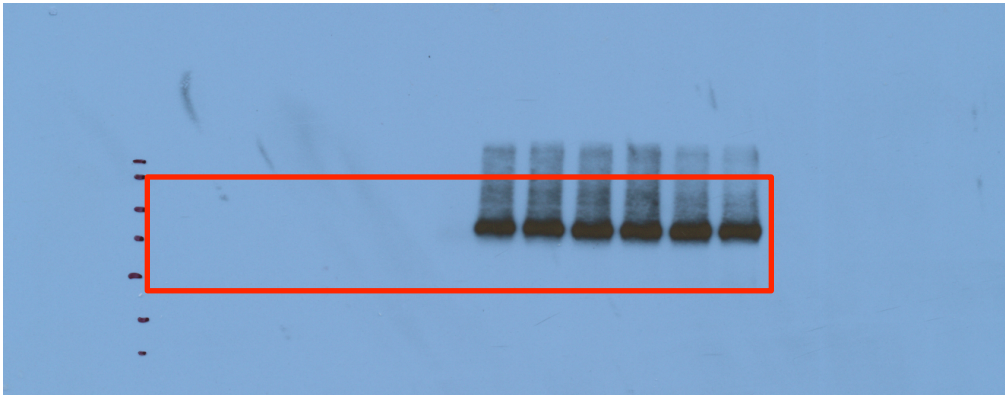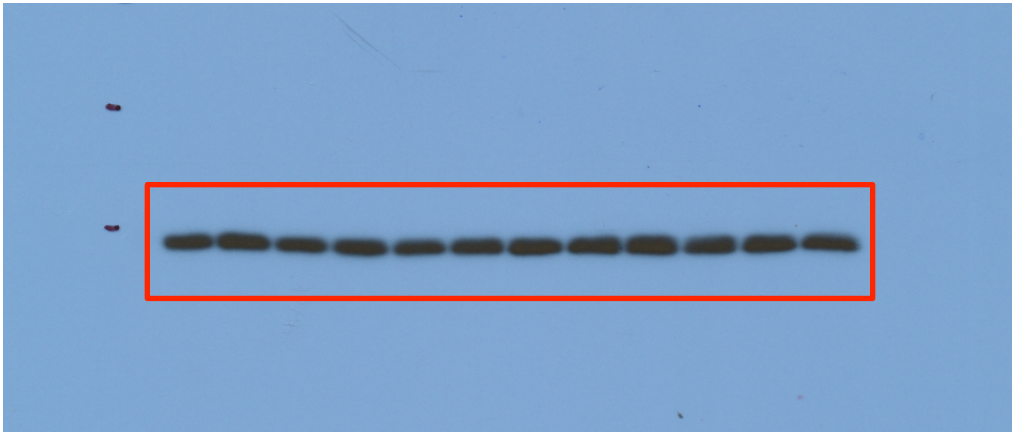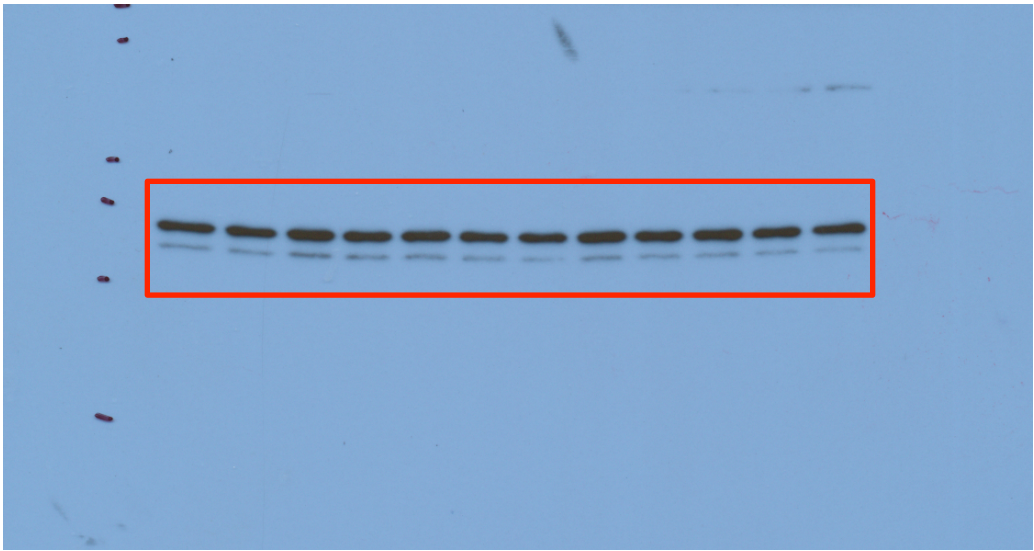

**Fig. S4D: immunoblot**

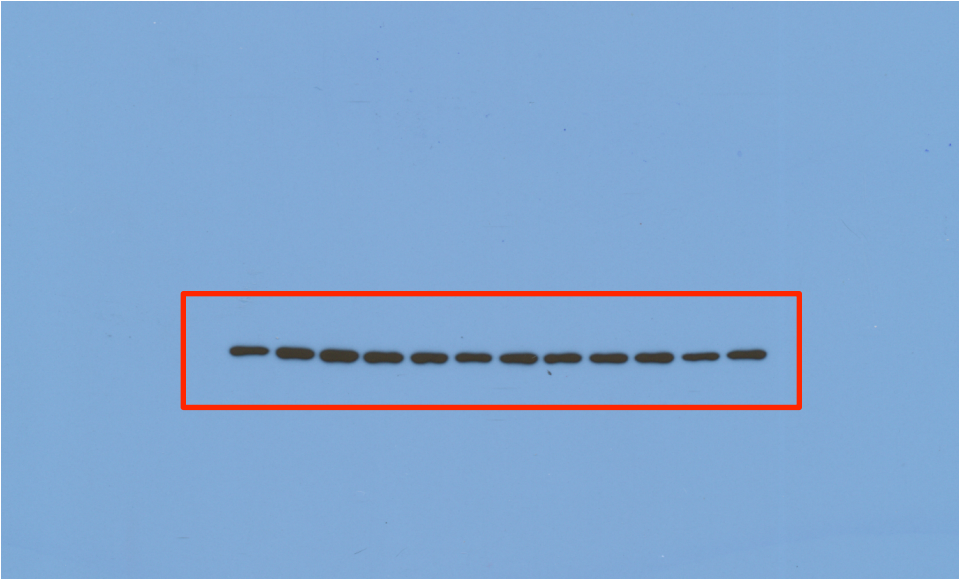

Fig. S4F: immunoblot

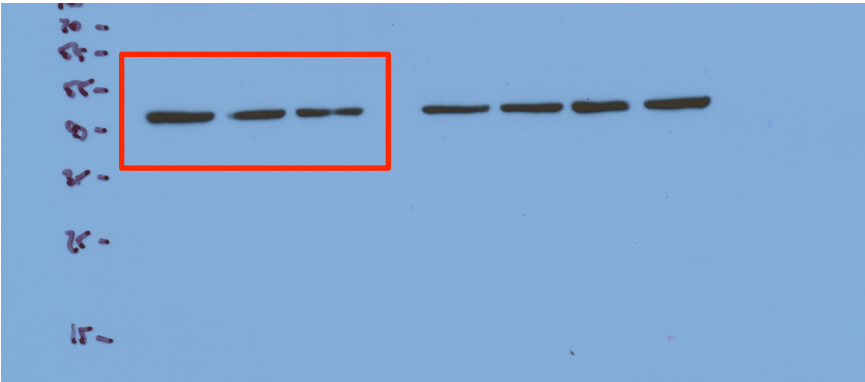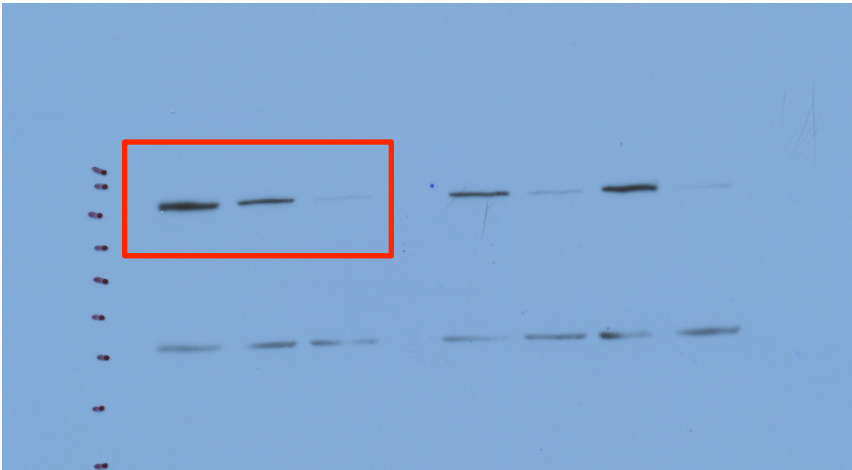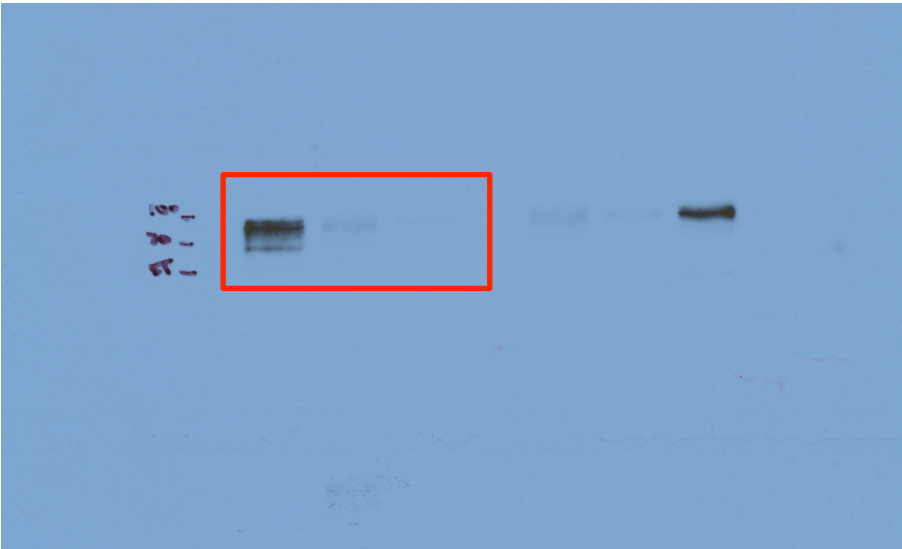

Supplement: embj0033-0282-sd9.pdf [file embj0033-0282-sd9.pdf]
